# Supplementary material for: Kinetic study of the reaction of thiophene-tocopherols with peroxyl radicals enlightenings the role of O˙⋯S noncovalent interactions in H-atom transfer
Source: Royal Society of Chemistry journal article supplement (doi:10.1039/d4ob00944d), 2024-01-01
Supplement: d4ob00944d1.pdf [file d4ob00944d1.pdf]

## Supporting Information

# Kinetic study of the reaction of thiophene-tocopherols with peroxy radicals enlightens the role of O<sup>•</sup>---S noncovalent interactions on H-atom transfer

Andrea Baschieri,<sup>a\*</sup> Zongxin Jin,<sup>b</sup> Riccardo Amorati,<sup>b</sup> Kristian Vasa,<sup>c</sup> Allegra Baroncelli,<sup>c</sup>

Stefano Menichetti<sup>c</sup> and Caterina Viglianisi<sup>c\*</sup>

- <sup>a</sup> Institute for Organic Synthesis and Photoreactivity (ISOF), National Research Council of Italy (CNR), Via Piero Gobetti 101, 40129 Bologna, Italy.  
<sup>b</sup> Department of Chemistry "G. Ciamician", University of Bologna, Via P. Gobetti 85, 40129 Bologna, Italy.  
<sup>c</sup> Department of Chemistry "Ugo Schiff" - DICUS, University of Florence, Via Della Lastruccia 3-13, I-50019 Sesto Fiorentino, Firenze, Italy.

E-mail: A. B.: [andrea.baschieri@isof.cnr.it](mailto:andrea.baschieri@isof.cnr.it)  
C. V.: [caterina.viglianisi@unifi.it](mailto:caterina.viglianisi@unifi.it)

## Table of Contents

| <i>Contents</i>                                                                                    | <i>Pages</i> |
|----------------------------------------------------------------------------------------------------|--------------|
| <sup>1</sup> H NMR spectra of intermediates <b>11 – 13</b>                                         | S2 – S3      |
| <sup>1</sup> H NMR and <sup>13</sup> C { <sup>1</sup> H} NMR spectra of antioxidants <b>8 – 10</b> | S4 – S6      |
| Theoretical calculations by <b>CBS-QB3</b>                                                         | S7 – S13     |
| Theoretical calculations by <b>B3LYP/6-31+g(d,p)</b>                                               | S14 – S26    |

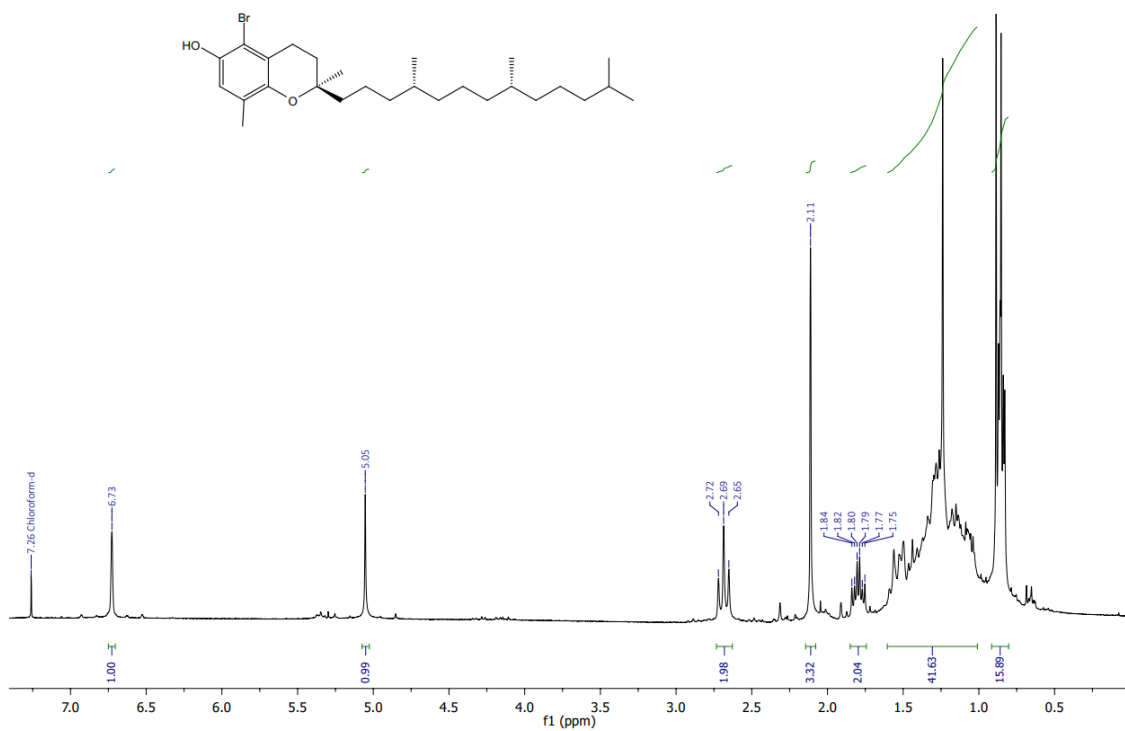

**Figure S1.** <sup>1</sup>H NMR spectrum of intermediate **11** in CDCl<sub>3</sub>.

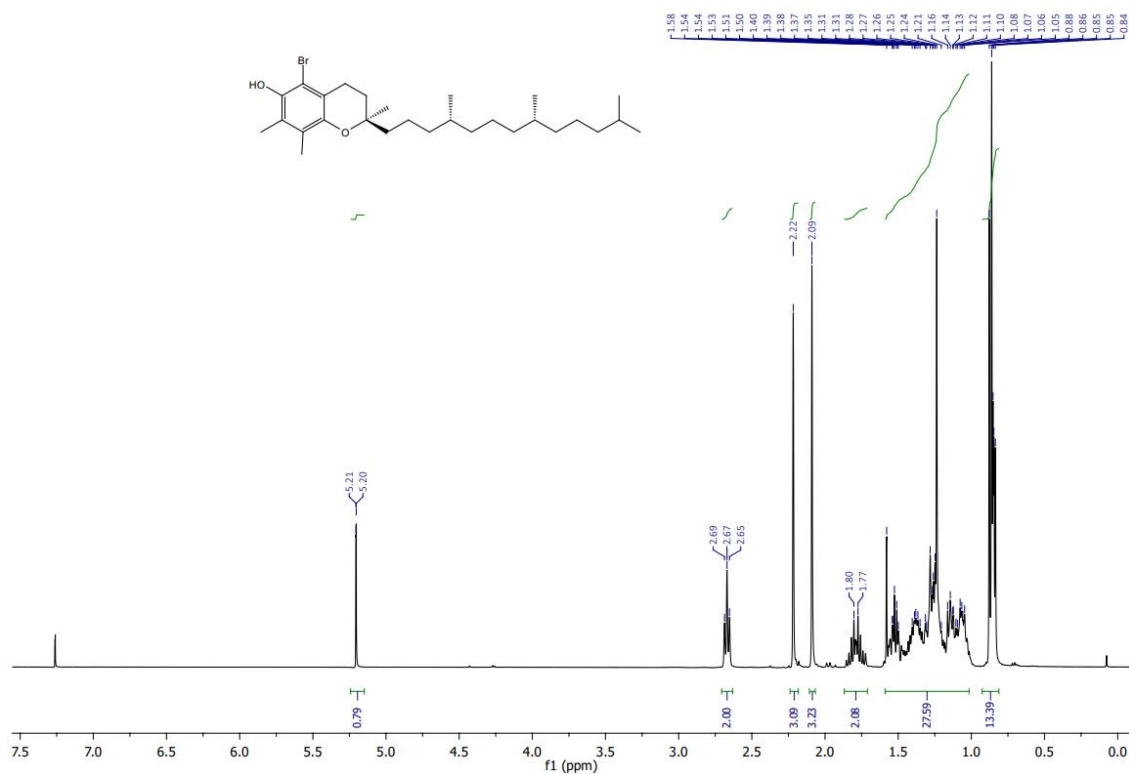

**Figure S2.** <sup>1</sup>H NMR spectrum of intermediate **12** in CDCl<sub>3</sub>.

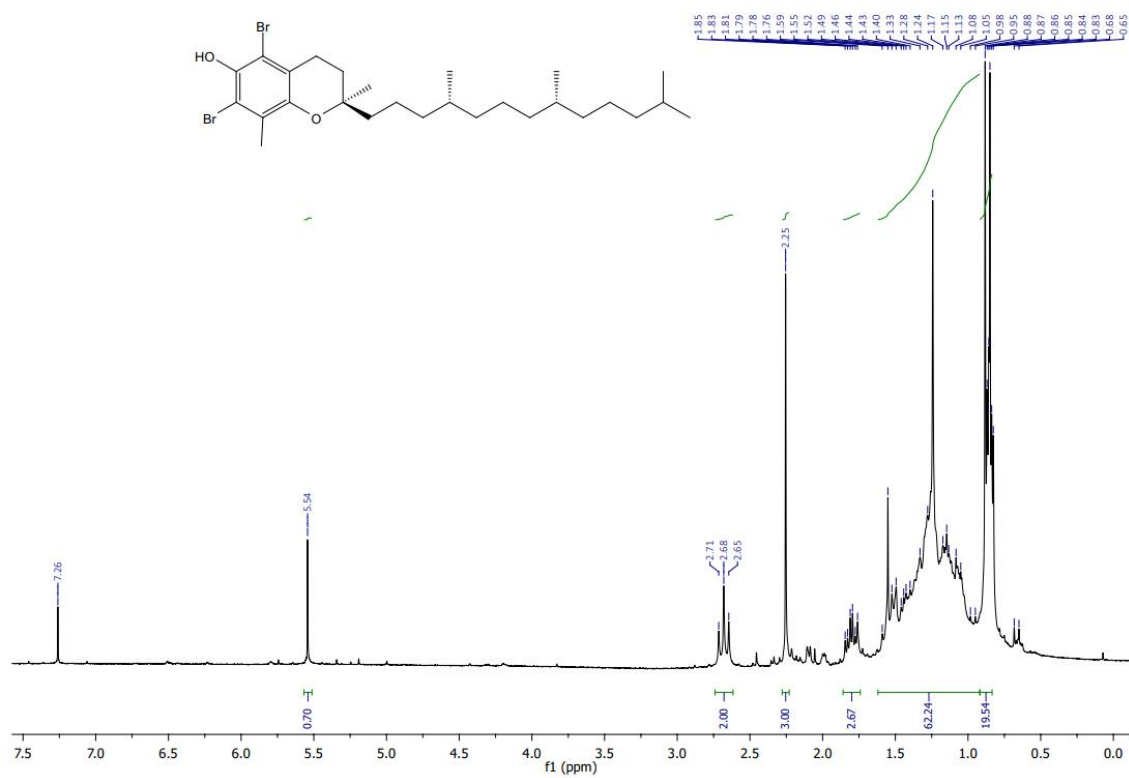

**Figure S3.**  $^1\text{H}$  NMR spectrum of intermediate **13** in  $\text{CDCl}_3$ .

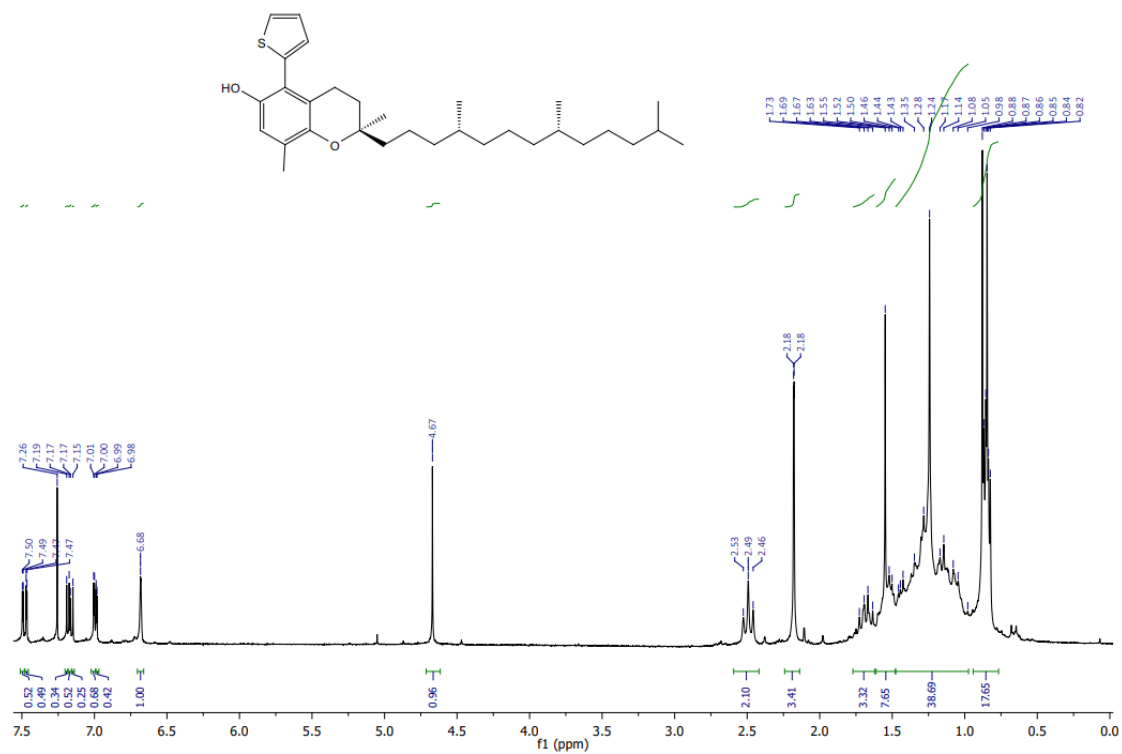

**Figure S4.** <sup>1</sup>H NMR spectrum of antioxidant **8** in CDCl<sub>3</sub>.

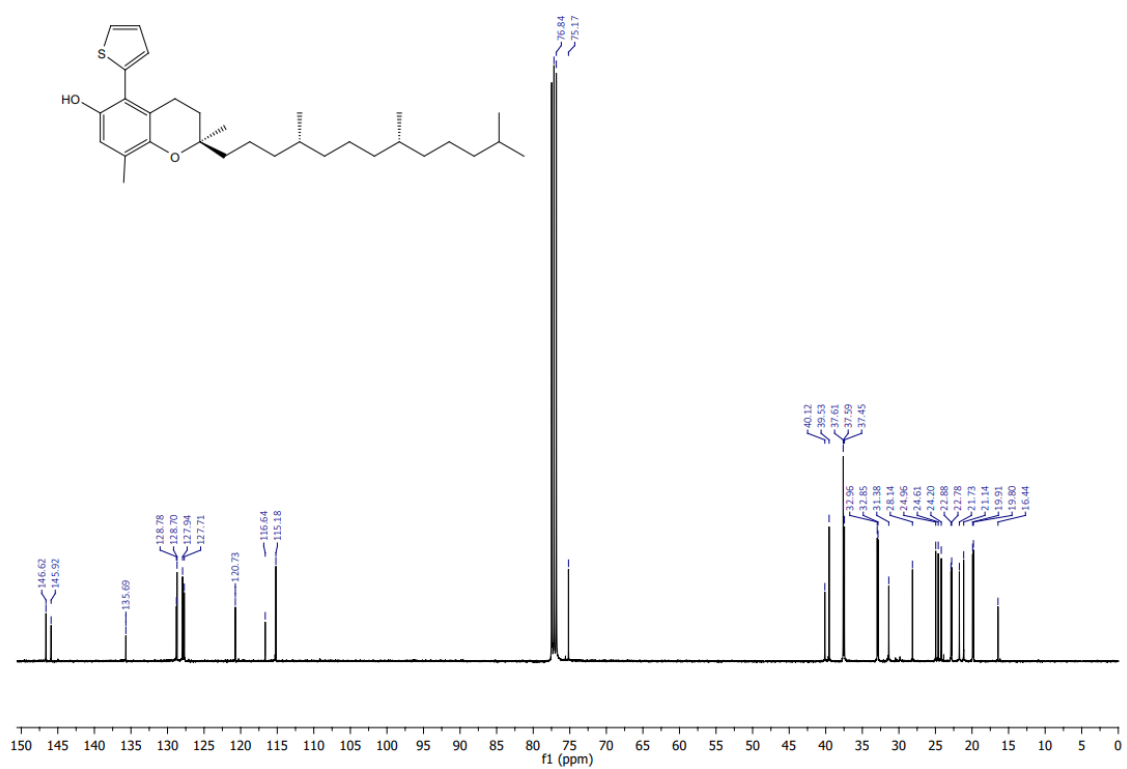

**Figure S5.** <sup>13</sup>C {<sup>1</sup>H} NMR spectrum of antioxidant **8** in CDCl<sub>3</sub>.

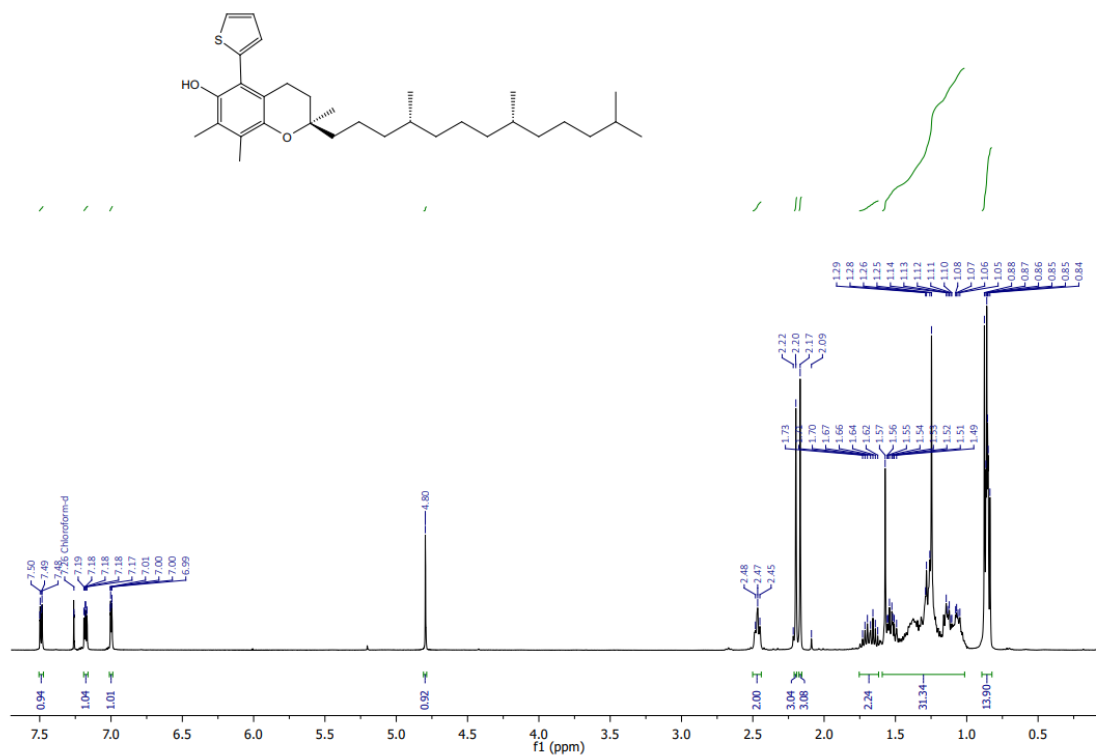

Figure S6.  $^1\text{H}$  NMR spectrum of antioxidant 9 in  $\text{CDCl}_3$ .

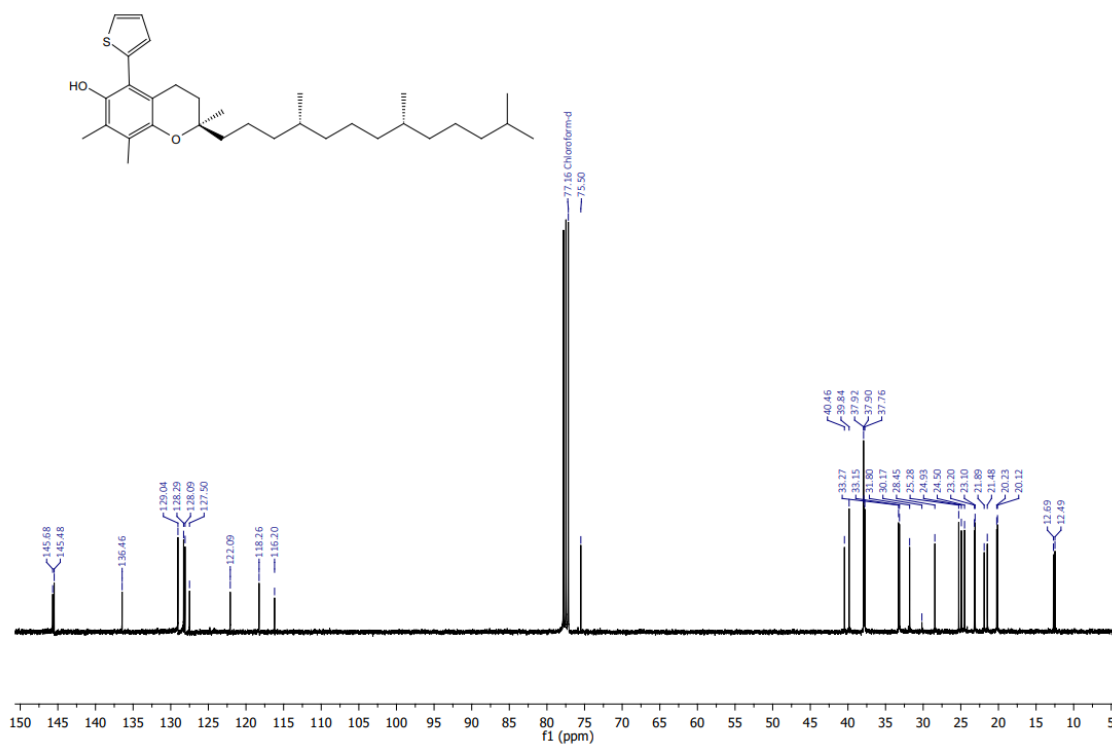

Figure S7.  $^{13}\text{C}$   $\{^1\text{H}\}$  NMR spectrum of antioxidant 9 in  $\text{CDCl}_3$ .

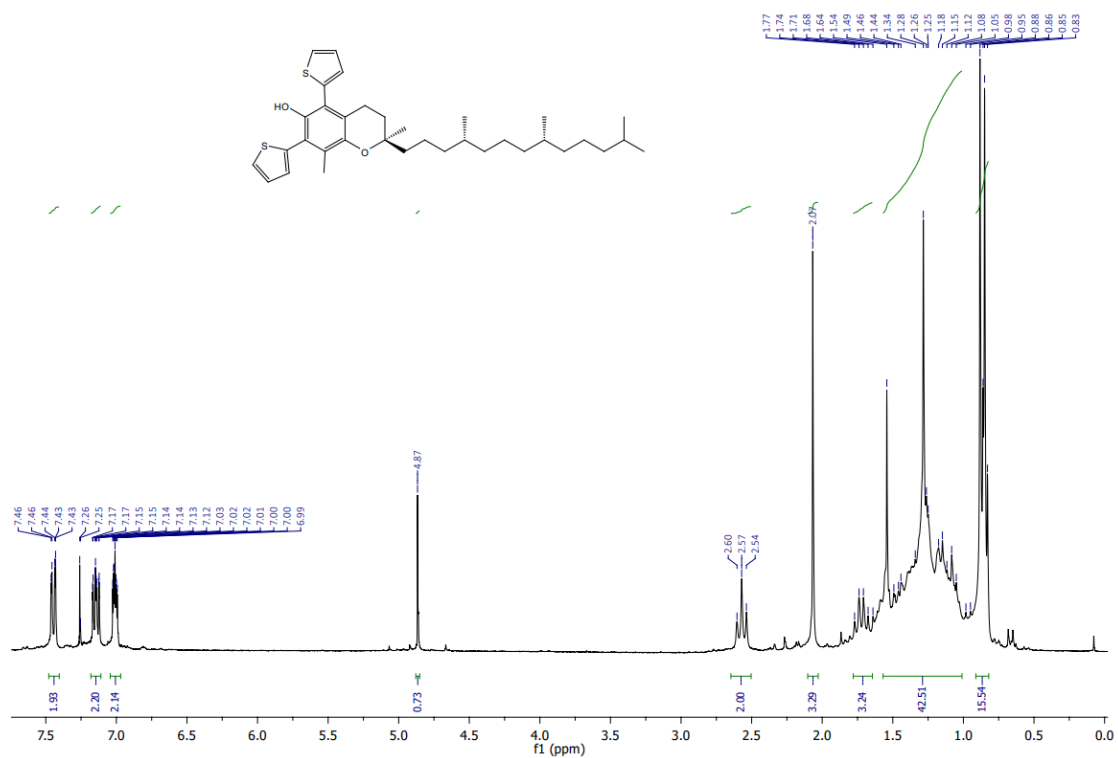

Figure S8.  $^1\text{H}$  NMR spectrum of antioxidant **10** in  $\text{CDCl}_3$ .

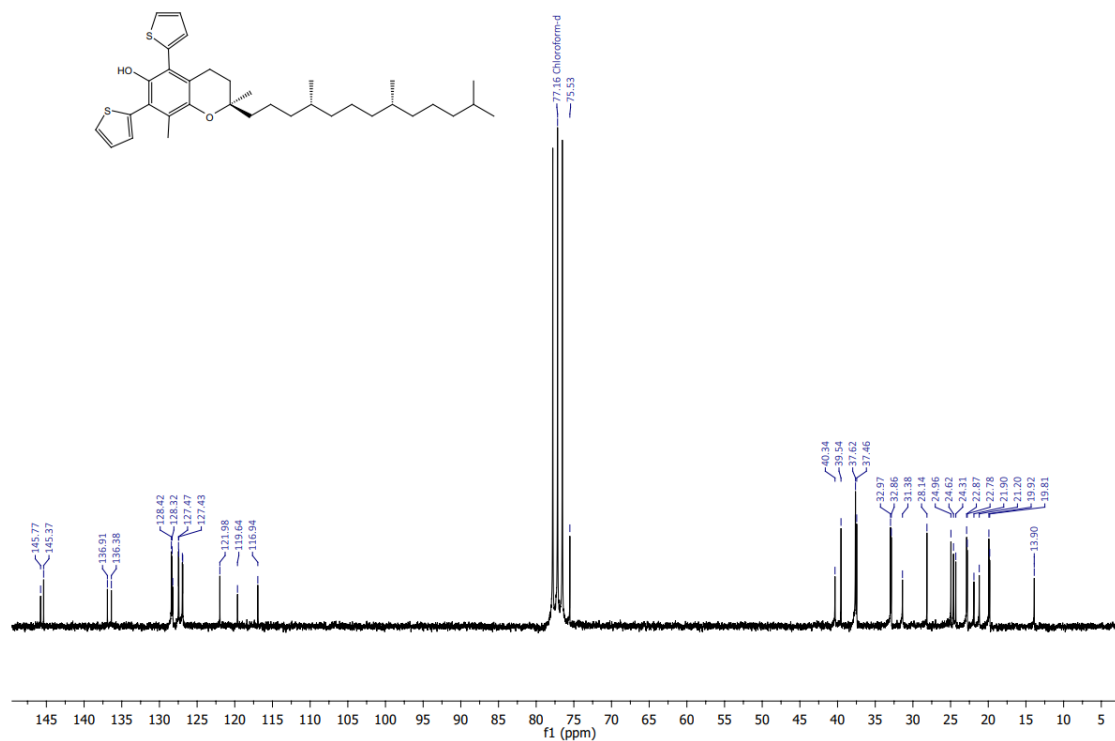

Figure S9.  $^{13}\text{C}$   $\{^1\text{H}\}$  NMR spectrum of antioxidant **10** in  $\text{CDCl}_3$ .

## CBS-QB3 optimized structures and energies in gas phase

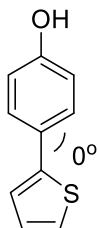

CBS-QB3 Enthalpy= -858.031851 CBS-QB3 Free Energy= -858.076574

0 1

|   |             |             |            |
|---|-------------|-------------|------------|
| C | 1.44924400  | -3.38038000 | 0.00000000 |
| S | -0.04861900 | -2.52123200 | 0.00000000 |
| C | 0.75670300  | -0.96844200 | 0.00000000 |
| C | 2.12037000  | -1.15894200 | 0.00000000 |
| C | 2.51292500  | -2.52452700 | 0.00000000 |
| C | 0.00000000  | 0.29012700  | 0.00000000 |
| C | 0.66007800  | 1.52886800  | 0.00000000 |
| C | -0.04301900 | 2.72673500  | 0.00000000 |
| C | -1.43915800 | 2.72274000  | 0.00000000 |
| C | -2.11786200 | 1.50332700  | 0.00000000 |
| C | -1.40557500 | 0.31395600  | 0.00000000 |
| H | 0.49753000  | 3.66904000  | 0.00000000 |
| H | -3.20094100 | 1.50627400  | 0.00000000 |
| H | -1.96064200 | -0.61733800 | 0.00000000 |
| H | 1.44919800  | -4.45924600 | 0.00000000 |
| H | 3.54368900  | -2.85401000 | 0.00000000 |
| H | 2.83175800  | -0.34422000 | 0.00000000 |
| H | 1.74233100  | 1.56646300  | 0.00000000 |
| O | -2.18598900 | 3.86540400  | 0.00000000 |
| H | -1.59933500 | 4.62875300  | 0.00000000 |

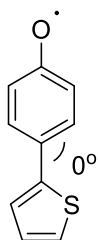

CBS-QB3 Enthalpy= -857.402935 CBS-QB3 Free Energy= -857.451053

0 2

|   |             |             |            |
|---|-------------|-------------|------------|
| C | 1.19030800  | -3.39762300 | 0.00000000 |
| S | -0.24870900 | -2.45565100 | 0.00000000 |
| C | 0.65597300  | -0.95119100 | 0.00000000 |
| C | 2.01683200  | -1.23318700 | 0.00000000 |
| C | 2.31526000  | -2.61215400 | 0.00000000 |
| C | 0.00000000  | 0.33203600  | 0.00000000 |
| C | 0.76324600  | 1.53952700  | 0.00000000 |
| C | 0.16162200  | 2.76355000  | 0.00000000 |
| C | -1.28903400 | 2.90371200  | 0.00000000 |
| C | -2.04513000 | 1.65828300  | 0.00000000 |
| C | -1.42183200 | 0.44423800  | 0.00000000 |
| H | 0.73982400  | 3.68017800  | 0.00000000 |
| H | -3.12551500 | 1.74232500  | 0.00000000 |
| H | -2.02260400 | -0.45902400 | 0.00000000 |
| H | 1.12577400  | -4.47492300 | 0.00000000 |
| H | 3.32032500  | -3.01203400 | 0.00000000 |
| H | 2.77831300  | -0.46614300 | 0.00000000 |
| H | 1.84486100  | 1.48120400  | 0.00000000 |
| O | -1.84563800 | 4.01446200  | 0.00000000 |

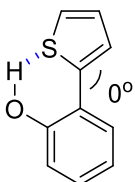

CBS-QB3 Enthalpy= -858.028457 CBS-QB3 Free Energy= -858.072091

0 1

|   |             |             |            |
|---|-------------|-------------|------------|
| C | -1.39982600 | 0.89377400  | 0.00000000 |
| C | -1.92194400 | 2.19290500  | 0.00000000 |
| C | -1.09356200 | 3.30015400  | 0.00000000 |
| C | 0.29099600  | 3.12076600  | 0.00000000 |
| C | 0.81059900  | 1.83914400  | 0.00000000 |
| C | 0.00000000  | 0.68236600  | 0.00000000 |
| H | -3.00049800 | 2.29266400  | 0.00000000 |
| H | 0.95886700  | 3.97377800  | 0.00000000 |
| H | 1.88570700  | 1.72041700  | 0.00000000 |
| C | 0.66746800  | -0.63280200 | 0.00000000 |



|   |             |             |            |
|---|-------------|-------------|------------|
| O | -2.35480900 | -0.08105500 | 0.00000000 |
| H | -1.98478700 | -0.96924500 | 0.00000000 |
| C | 2.02370400  | -0.89083700 | 0.00000000 |
| S | -0.18248900 | -2.16372300 | 0.00000000 |
| H | -1.52204500 | 4.29566900  | 0.00000000 |
| C | 1.27023500  | -3.09058400 | 0.00000000 |
| C | 2.35999300  | -2.26929600 | 0.00000000 |
| H | 3.37797500  | -2.63591700 | 0.00000000 |
| H | 1.22154900  | -4.16778100 | 0.00000000 |
| H | 2.77555200  | -0.11512000 | 0.00000000 |

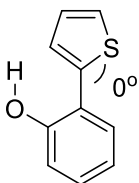

CBS-QB3 Enthalpy= -858.027698 CBS-QB3 Free Energy= -858.071384

0 1

|   |             |             |            |
|---|-------------|-------------|------------|
| C | -0.70671800 | -3.28909600 | 0.00000000 |
| S | -1.48832600 | -1.75505500 | 0.00000000 |
| C | 0.03146500  | -0.87479100 | 0.00000000 |
| C | 1.06449000  | -1.79417100 | 0.00000000 |
| C | 0.64906400  | -3.15375500 | 0.00000000 |
| C | 0.00000000  | 0.60066900  | 0.00000000 |
| C | 1.15251100  | 1.42321800  | 0.00000000 |
| C | 1.03686000  | 2.81657300  | 0.00000000 |
| C | -0.20326700 | 3.43140600  | 0.00000000 |
| C | -1.35765700 | 2.64761300  | 0.00000000 |
| C | -1.24321300 | 1.26832500  | 0.00000000 |
| O | 2.43384200  | 0.96058300  | 0.00000000 |
| H | 1.95471700  | 3.39189600  | 0.00000000 |
| H | -2.33847900 | 3.10733100  | 0.00000000 |
| H | -2.15283300 | 0.67981000  | 0.00000000 |
| H | 2.44221300  | 0.00268400  | 0.00000000 |
| H | -0.26994000 | 4.51317700  | 0.00000000 |
| H | -1.29688000 | -4.19223100 | 0.00000000 |
| H | 1.33855700  | -3.98744900 | 0.00000000 |
| H | 2.12390700  | -1.57495400 | 0.00000000 |

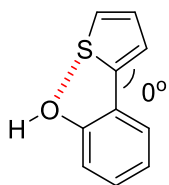

CBS-QB3 Enthalpy= -858.030783 CBS-QB3 Free Energy= -858.075186

0 1

|   |             |             |            |
|---|-------------|-------------|------------|
| C | -2.45404100 | -2.16401600 | 0.00000000 |
| C | -2.06426600 | -0.80274800 | 0.00000000 |
| C | -0.69730300 | -0.60284100 | 0.00000000 |
| S | 0.11076400  | -2.15921000 | 0.00000000 |
| C | -1.38291900 | -3.01352900 | 0.00000000 |
| C | 0.00000000  | 0.69203500  | 0.00000000 |
| C | 1.40510600  | 0.82093600  | 0.00000000 |
| C | 2.01912400  | 2.07369500  | 0.00000000 |
| C | 1.25880900  | 3.23564500  | 0.00000000 |
| C | -0.13097800 | 3.14012400  | 0.00000000 |
| C | -0.73647900 | 1.89159600  | 0.00000000 |
| O | 2.14940400  | -0.32488400 | 0.00000000 |
| H | 3.10425700  | 2.12814900  | 0.00000000 |
| H | -0.74215900 | 4.03471900  | 0.00000000 |
| H | -1.81727900 | 1.84141700  | 0.00000000 |
| H | 1.74805800  | 4.20252100  | 0.00000000 |
| H | -3.48458500 | -2.49407600 | 0.00000000 |
| H | -1.38250700 | -4.09298000 | 0.00000000 |
| H | -2.78186500 | 0.00565900  | 0.00000000 |
| H | 3.08629900  | -0.10435100 | 0.00000000 |

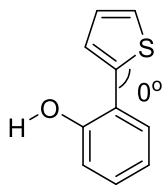

CBS-QB3 Enthalpy= -858.031023 CBS-QB3 Free Energy= -858.075346

0 1

|   |             |            |            |
|---|-------------|------------|------------|
| C | -1.18272200 | 1.35868400 | 0.00000000 |
| C | 0.00000000  | 0.59686700 | 0.00000000 |
| C | 1.21410900  | 1.32206100 | 0.00000000 |
| C | 1.21473700  | 2.71752800 | 0.00000000 |

|   |             |             |            |
|---|-------------|-------------|------------|
| C | 0.02512900  | 3.43488600  | 0.00000000 |
| C | -1.18461300 | 2.74646200  | 0.00000000 |
| C | -0.05339600 | -0.87139300 | 0.00000000 |
| S | -1.60503300 | -1.69358300 | 0.00000000 |
| C | -0.86323400 | -3.24950500 | 0.00000000 |
| C | 0.49799300  | -3.15278200 | 0.00000000 |
| C | 0.95834200  | -1.80842700 | 0.00000000 |
| O | 2.39570900  | 0.63300700  | 0.00000000 |
| H | 2.16694800  | 3.24137000  | 0.00000000 |
| H | -2.12487800 | 3.28443900  | 0.00000000 |
| H | -2.13486300 | 0.84126200  | 0.00000000 |
| H | 0.04782500  | 4.51825300  | 0.00000000 |
| H | -1.47845000 | -4.13603400 | 0.00000000 |
| H | 1.15728200  | -4.01100600 | 0.00000000 |
| H | 2.00009900  | -1.53537600 | 0.00000000 |
| H | 3.12281400  | 1.26407600  | 0.00000000 |

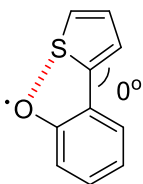

CBS-QB3 Enthalpy= -857.402890 CBS-QB3 Free Energy= -857.449742

0 2

|   |             |             |            |
|---|-------------|-------------|------------|
| C | -2.47945200 | -2.10547600 | 0.00000000 |
| C | -2.08660700 | -0.75617500 | 0.00000000 |
| C | -0.70366900 | -0.56770000 | 0.00000000 |
| S | 0.10594500  | -2.12577400 | 0.00000000 |
| C | -1.40023500 | -2.95786400 | 0.00000000 |
| C | 0.00000000  | 0.68432200  | 0.00000000 |
| C | 1.47709900  | 0.70324300  | 0.00000000 |
| C | 2.13564700  | 1.99819100  | 0.00000000 |
| C | 1.42133700  | 3.15870400  | 0.00000000 |
| C | 0.00042500  | 3.11992300  | 0.00000000 |
| C | -0.67977500 | 1.91762400  | 0.00000000 |
| O | 2.13574700  | -0.35325400 | 0.00000000 |
| H | 3.21874600  | 1.98123200  | 0.00000000 |
| H | -0.55798700 | 4.04887900  | 0.00000000 |
| H | -1.76258700 | 1.93329200  | 0.00000000 |
| H | 1.92810100  | 4.11739400  | 0.00000000 |

|   |             |             |            |
|---|-------------|-------------|------------|
| H | -3.50952100 | -2.43580300 | 0.00000000 |
| H | -1.41384300 | -4.03799000 | 0.00000000 |
| H | -2.79261900 | 0.06264500  | 0.00000000 |

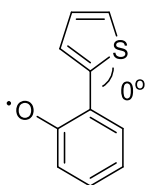

CBS-QB3 Enthalpy= -857.401157 CBS-QB3 Free Energy= -857.448586

0 2

|   |             |             |            |
|---|-------------|-------------|------------|
| C | -0.78431000 | -3.24690200 | 0.00000000 |
| S | -1.57601700 | -1.72004300 | 0.00000000 |
| C | -0.04014300 | -0.85376700 | 0.00000000 |
| C | 1.00521000  | -1.77020400 | 0.00000000 |
| C | 0.58104700  | -3.11630800 | 0.00000000 |
| C | 0.00000000  | 0.58656200  | 0.00000000 |
| C | 1.29614200  | 1.31139400  | 0.00000000 |
| C | 1.24177500  | 2.76688100  | 0.00000000 |
| C | 0.06173700  | 3.44919500  | 0.00000000 |
| C | -1.16403500 | 2.73533300  | 0.00000000 |
| C | -1.17924000 | 1.35168500  | 0.00000000 |
| O | 2.39686900  | 0.73308900  | 0.00000000 |
| H | 2.20179500  | 3.26893600  | 0.00000000 |
| H | -2.10168800 | 3.27884100  | 0.00000000 |
| H | -2.13930700 | 0.84758200  | 0.00000000 |
| H | 0.05073300  | 4.53347100  | 0.00000000 |
| H | -1.37078100 | -4.15314000 | 0.00000000 |
| H | 1.25872600  | -3.95958400 | 0.00000000 |
| H | 2.03274100  | -1.44333600 | 0.00000000 |

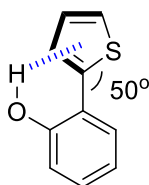

CBS-QB3 Enthalpy= -858.033809 CBS-QB3 Free Energy= -858.080496

0 1

|   |             |             |            |
|---|-------------|-------------|------------|
| C | -1.23743800 | -1.36774800 | 0.42642800 |
| C | -0.62067600 | -0.14068500 | 0.14101100 |

|   |             |             |             |
|---|-------------|-------------|-------------|
| C | -1.43927200 | 0.95456800  | -0.20705000 |
| C | -2.82714800 | 0.81136000  | -0.24357300 |
| C | -3.41200800 | -0.41229700 | 0.05512200  |
| C | -2.61846300 | -1.51082300 | 0.38674200  |
| C | 0.84404900  | 0.01251900  | 0.18090500  |
| O | -0.93009100 | 2.17579900  | -0.52826800 |
| H | -3.42408200 | 1.67278500  | -0.51742000 |
| H | -3.07219400 | -2.46645500 | 0.61993500  |
| H | -0.61290700 | -2.20990100 | 0.70241800  |
| H | -4.49140100 | -0.50911500 | 0.02495200  |
| S | 1.88931400  | -1.10648400 | -0.65437700 |
| C | 1.59861400  | 0.97795200  | 0.81135800  |
| C | 3.00118300  | 0.80968300  | 0.63642900  |
| C | 3.30952300  | -0.27936500 | -0.12777400 |
| H | 1.15944400  | 1.75406300  | 1.42592000  |
| H | 3.74529200  | 1.46345100  | 1.07184600  |
| H | 4.28391300  | -0.64526500 | -0.41268700 |
| H | 0.03345000  | 2.10679400  | -0.57637800 |

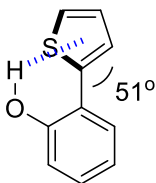

CBS-QB3 Enthalpy= -858.032786 CBS-QB3 Free Energy= -858.079796

0 1

|   |             |             |             |
|---|-------------|-------------|-------------|
| C | -3.01479200 | -0.98956100 | 0.63598800  |
| C | -1.61699700 | -1.20302500 | 0.79602700  |
| C | -0.83620400 | -0.32111400 | 0.09061500  |
| S | -1.85842700 | 0.79126900  | -0.79982100 |
| C | -3.29912200 | 0.06059300  | -0.18855400 |
| C | 0.63527500  | -0.28236300 | 0.00138300  |
| C | 1.34747300  | -1.44456500 | -0.33249200 |
| C | 2.73495200  | -1.45389700 | -0.39274000 |
| C | 3.43934500  | -0.28050600 | -0.12167200 |
| C | 2.76023300  | 0.88303200  | 0.21376700  |
| C | 1.36569200  | 0.89090200  | 0.28002200  |
| O | 0.77398700  | 2.06640100  | 0.63298000  |
| H | 3.28774400  | 1.80203100  | 0.43851600  |
| H | 3.26125800  | -2.36294000 | -0.65783500 |

|   |             |             |             |
|---|-------------|-------------|-------------|
| H | 0.78611000  | -2.34317400 | -0.56131300 |
| H | 4.52235800  | -0.27082600 | -0.17057400 |
| H | -4.26337100 | 0.44965000  | -0.47703400 |
| H | -3.77490100 | -1.58661200 | 1.12242800  |
| H | -0.17965700 | 1.93640500  | 0.71849100  |
| H | -1.19174200 | -1.97303100 | 1.42654100  |

**B3LYP/6-31+g(d,p) optimized structures and energies in gas phase**

H<sup>\*</sup> Sum of electronic and thermal Enthalpies: -0.497921

0 2

|   |             |            |            |
|---|-------------|------------|------------|
| H | -0.92984050 | 2.58277519 | 0.41701857 |
|---|-------------|------------|------------|

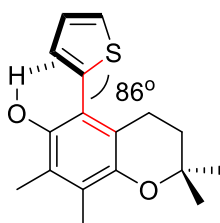

Sum of electronic and thermal Enthalpies: -1208.204694

0 1

|   |             |             |             |
|---|-------------|-------------|-------------|
| C | -2.89202900 | -1.61276500 | 0.06199800  |
| O | -2.76128900 | -0.20411400 | -0.26134200 |
| C | -1.52897700 | 0.40358000  | -0.12188000 |
| C | -0.33670500 | -0.32667600 | -0.03658900 |
| C | -0.36749700 | -1.84114500 | -0.05737100 |
| C | -1.71225800 | -2.36968000 | -0.56443400 |
| C | -1.53423800 | 1.81450500  | -0.10741200 |
| C | -0.32105900 | 2.51192600  | 0.00734500  |
| C | 0.87490300  | 1.78259800  | 0.11366000  |
| C | 0.88066400  | 0.37871100  | 0.08799100  |

|   |             |             |             |
|---|-------------|-------------|-------------|
| C | 2.17924600  | -0.33336200 | 0.19290800  |
| S | 3.06783400  | -0.83838200 | -1.23895000 |
| C | 4.34325100  | -1.52073800 | -0.28387800 |
| C | 4.10888600  | -1.36427900 | 1.05663500  |
| C | 2.87894300  | -0.68720500 | 1.32462700  |
| C | -2.83655200 | 2.57176200  | -0.21957400 |
| C | -0.29292700 | 4.02262700  | 0.02267600  |
| O | 2.04385600  | 2.49561100  | 0.24141400  |
| C | -4.21697300 | -2.03174800 | -0.57460000 |
| C | -2.95143100 | -1.76864500 | 1.58954300  |
| H | 2.51071700  | -0.47146400 | 2.32204400  |
| H | 4.78547600  | -1.71672200 | 1.82693800  |
| H | 2.77805600  | 1.87112400  | 0.34263100  |
| H | -3.68965000 | 1.89672700  | -0.16371400 |
| H | -2.92994700 | 3.31899000  | 0.57658100  |
| H | -2.89746000 | 3.11408000  | -1.17209100 |
| H | -5.03877200 | -1.42699600 | -0.17890200 |
| H | -4.18182900 | -1.89647500 | -1.65979600 |
| H | -4.42703800 | -3.08465100 | -0.35955300 |
| H | -0.80432300 | 4.43786400  | -0.85349300 |
| H | -0.80335100 | 4.42236500  | 0.90823600  |
| H | 0.73116500  | 4.39542400  | 0.02921200  |
| H | 5.19077200  | -1.99098100 | -0.76432000 |
| H | -3.04257700 | -2.82541900 | 1.86416200  |
| H | -2.05697800 | -1.36562400 | 2.07210100  |
| H | -3.81872600 | -1.23228400 | 1.98617200  |
| H | 0.44079200  | -2.22675300 | -0.68659600 |
| H | -0.16428200 | -2.22787800 | 0.95080500  |
| H | -1.80678100 | -3.44121400 | -0.35518900 |
| H | -1.77262500 | -2.24479800 | -1.65247800 |

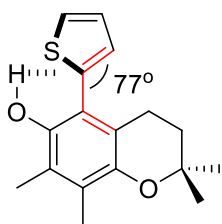

Sum of electronic and thermal Enthalpies: -1208.205087

0 1

|   |             |             |             |
|---|-------------|-------------|-------------|
| C | -2.86046600 | -1.62619900 | -0.01533000 |
|---|-------------|-------------|-------------|

|   |             |             |             |
|---|-------------|-------------|-------------|
| O | -2.76678500 | -0.18961900 | -0.19817300 |
| C | -1.53019500 | 0.41916900  | -0.11824800 |
| C | -0.33076000 | -0.29966400 | -0.19638000 |
| C | -0.35488500 | -1.80547900 | -0.36133700 |
| C | -1.73290400 | -2.29564700 | -0.81422000 |
| C | -1.54306900 | 1.82500300  | 0.00341000  |
| C | -0.32904300 | 2.52885300  | 0.04270300  |
| C | 0.87678100  | 1.81045400  | -0.02058400 |
| C | 0.88899000  | 0.41077800  | -0.13861800 |
| C | 2.19577700  | -0.28820000 | -0.20527600 |
| S | 2.84905800  | -1.15414000 | 1.17708400  |
| C | 4.27946500  | -1.59826200 | 0.30477000  |
| C | 4.26622200  | -1.10134600 | -0.97168400 |
| C | 3.08193700  | -0.35457300 | -1.25867700 |
| C | -2.85590500 | 2.56883300  | 0.07613000  |
| C | -0.30823700 | 4.03528100  | 0.16069000  |
| O | 2.04671900  | 2.53038400  | 0.04331400  |
| C | -4.23174700 | -1.99674500 | -0.57996000 |
| C | -2.79024500 | -1.94100200 | 1.48706200  |
| H | 2.87438200  | 0.10720900  | -2.21833700 |
| H | 5.06679300  | -1.26266100 | -1.68468200 |
| H | 2.79236300  | 1.91681500  | -0.04202500 |
| H | -3.68957900 | 1.88094800  | 0.21290000  |
| H | -2.85749900 | 3.28897700  | 0.90158300  |
| H | -3.03975400 | 3.13899900  | -0.84407900 |
| H | -5.02073700 | -1.44707800 | -0.05747300 |
| H | -4.28855700 | -1.75108900 | -1.64469000 |
| H | -4.41727700 | -3.06891300 | -0.45744100 |
| H | -0.94097800 | 4.50208000  | -0.60266500 |
| H | -0.68914100 | 4.36463800  | 1.13605000  |
| H | 0.70462900  | 4.42245900  | 0.05049400  |
| H | 5.04474200  | -2.19507300 | 0.78261500  |
| H | -2.84871800 | -3.02202100 | 1.65586200  |
| H | -1.86262000 | -1.57450100 | 1.93467100  |
| H | -3.62625100 | -1.46417600 | 2.00754100  |
| H | 0.40775800  | -2.11113100 | -1.08573700 |
| H | -0.07628700 | -2.29273300 | 0.58252900  |
| H | -1.80495200 | -3.38452300 | -0.71435000 |
| H | -1.88302700 | -2.05562000 | -1.87394500 |



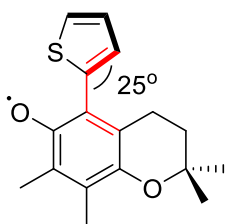

Sum of electronic and thermal Enthalpies: -1207.585839

0 2

|   |             |             |             |
|---|-------------|-------------|-------------|
| C | 2.33928300  | -1.88074100 | 0.58689900  |
| C | 2.15368700  | -0.58728700 | 0.10425900  |
| S | 3.70217500  | 0.04794800  | -0.45704900 |
| C | 4.50843600  | -1.43449200 | -0.09247500 |
| C | 3.66924800  | -2.35826600 | 0.48255500  |
| C | 0.92447600  | 0.19592400  | 0.04574300  |
| C | -0.35689600 | -0.38496000 | -0.02900600 |
| C | -1.48596300 | 0.46416500  | 0.00321700  |
| C | -1.40561600 | 1.89264900  | 0.08833000  |
| C | -0.16585600 | 2.49021700  | 0.09843400  |
| C | 1.04391200  | 1.66660100  | 0.03614300  |
| C | -0.59144400 | -1.87054500 | -0.21847700 |
| C | -1.96302900 | -2.14851800 | -0.83634300 |
| C | -3.07446400 | -1.41706900 | -0.08153900 |
| O | -2.76389500 | 0.01060800  | -0.07377500 |
| C | -4.41257100 | -1.51465300 | -0.81325000 |
| C | -3.21679000 | -1.87225200 | 1.37743700  |
| C | -2.69672800 | 2.67364700  | 0.13437100  |
| C | 0.02511100  | 3.98516500  | 0.15152900  |
| O | 2.17308500  | 2.20954700  | -0.03104000 |
| H | 1.55191500  | -2.46133700 | 1.04519100  |
| H | 3.98672200  | -3.33687400 | 0.82440300  |
| H | -3.32330900 | 2.34625000  | 0.97091500  |
| H | -2.51418600 | 3.74294100  | 0.23859100  |
| H | -3.28642200 | 2.51188000  | -0.77512100 |
| H | -5.17104900 | -0.90924500 | -0.30808300 |
| H | -4.31685000 | -1.16023200 | -1.84377500 |
| H | -4.75614000 | -2.55394300 | -0.83259900 |
| H | -0.43624900 | 4.48147800  | -0.71046300 |
| H | -0.42513500 | 4.41474100  | 1.05418700  |
| H | 1.09010000  | 4.21801300  | 0.15123000  |

|   |             |             |             |
|---|-------------|-------------|-------------|
| H | 5.56914200  | -1.53220700 | -0.28470000 |
| H | -3.45538000 | -2.94040500 | 1.42001600  |
| H | -2.29999700 | -1.70162500 | 1.94765200  |
| H | -4.02469200 | -1.31883300 | 1.86474500  |
| H | 0.19509500  | -2.28466300 | -0.85651900 |
| H | -0.51507400 | -2.40335500 | 0.73773300  |
| H | -2.16970800 | -3.22432300 | -0.83812400 |
| H | -1.97588300 | -1.81416900 | -1.88094700 |

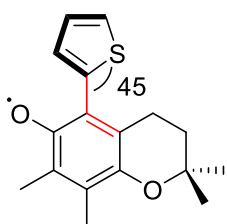

Sum of electronic and thermal Enthalpies: -1207.584565

0 2

|   |             |             |             |
|---|-------------|-------------|-------------|
| C | 3.38877400  | 0.21659600  | -0.81272400 |
| C | 2.25947000  | -0.22476600 | -0.14813900 |
| S | 2.65630000  | -1.66946100 | 0.78278500  |
| C | 4.29884400  | -1.64930600 | 0.24048400  |
| C | 4.53685900  | -0.59671800 | -0.60577900 |
| C | 0.94423900  | 0.42008600  | -0.09398300 |
| C | -0.26351500 | -0.28785100 | -0.14351300 |
| C | -1.47708500 | 0.43183100  | -0.03729500 |
| C | -1.54041700 | 1.85614800  | 0.08285300  |
| C | -0.36731400 | 2.58012800  | 0.09193500  |
| C | 0.92744300  | 1.89357300  | 0.00569400  |
| C | -0.33000600 | -1.78546400 | -0.37950300 |
| C | -1.69906100 | -2.20820400 | -0.91686400 |
| C | -2.83724700 | -1.61629400 | -0.08222300 |
| O | -2.69767200 | -0.16084300 | -0.07924100 |
| C | -4.19922700 | -1.86780400 | -0.72751700 |
| C | -2.82768600 | -2.09203800 | 1.37693500  |
| C | -2.90458400 | 2.49651700  | 0.17994800  |
| C | -0.33763900 | 4.08411100  | 0.19899700  |
| O | 1.99302800  | 2.55509900  | 0.02414400  |
| H | 3.38406400  | 1.11157200  | -1.41937600 |
| H | 5.50180600  | -0.40337700 | -1.06041200 |
| H | -3.46421600 | 2.09768500  | 1.03297900  |

|   |             |             |             |
|---|-------------|-------------|-------------|
| H | -2.83326400 | 3.57814200  | 0.29129600  |
| H | -3.50439100 | 2.28011200  | -0.71128000 |
| H | -4.98908400 | -1.35860200 | -0.16728100 |
| H | -4.21340600 | -1.49982500 | -1.75766700 |
| H | -4.41850300 | -2.94029200 | -0.73745800 |
| H | -0.88733300 | 4.55714400  | -0.62318800 |
| H | -0.79232500 | 4.42917000  | 1.13539200  |
| H | 0.69534300  | 4.43125600  | 0.17107000  |
| H | 4.98765500  | -2.41291800 | 0.57569600  |
| H | -2.93482200 | -3.18114600 | 1.42087800  |
| H | -1.90110400 | -1.81779800 | 1.88773900  |
| H | -3.66111500 | -1.64098800 | 1.92322800  |
| H | 0.45198900  | -2.07743300 | -1.08669100 |
| H | -0.11544700 | -2.33464900 | 0.54490200  |
| H | -1.78402500 | -3.30025600 | -0.92774900 |
| H | -1.81655300 | -1.86374000 | -1.95170500 |

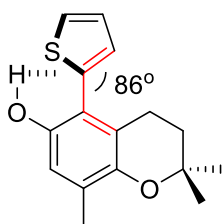

Sum of electronic and thermal Enthalpies: -1168.916789

0 1

|   |             |             |             |
|---|-------------|-------------|-------------|
| C | 2.94022200  | -1.32667100 | 0.05919500  |
| O | 2.78161500  | 0.08630900  | -0.23666900 |
| C | 1.53332300  | 0.65785700  | -0.11016500 |
| C | 0.35171200  | -0.08820600 | -0.02762300 |
| C | 0.41588400  | -1.60126700 | -0.04931500 |
| C | 1.76910300  | -2.09603600 | -0.56958500 |
| C | 1.51697700  | 2.06929700  | -0.10138000 |
| C | 0.29149200  | 2.71866100  | 0.01298800  |
| C | -0.90056400 | 1.99554600  | 0.11492700  |
| C | -0.88554500 | 0.59259000  | 0.09147000  |
| C | -2.17120000 | -0.14137900 | 0.19395000  |
| S | -3.04360800 | -0.67138200 | -1.23850000 |
| C | -4.31531700 | -1.36263900 | -0.28495700 |
| C | -4.09183700 | -1.19009400 | 1.05546800  |
| C | -2.87316800 | -0.49352800 | 1.32476300  |
| C | 2.80721000  | 2.84058500  | -0.21180500 |

|   |             |             |             |
|---|-------------|-------------|-------------|
| O | -2.06056800 | 2.71697100  | 0.23376800  |
| C | 3.01374700  | -1.50477800 | 1.58360900  |
| C | 4.26764300  | -1.71108000 | -0.59355200 |
| H | 0.24337200  | 3.80311200  | 0.02907800  |
| H | -2.51453100 | -0.26286300 | 2.32232900  |
| H | -4.76850300 | -1.54466100 | 1.82471500  |
| H | -5.15295900 | -1.84943100 | -0.76622800 |
| H | -2.80420600 | 2.10317800  | 0.33366600  |
| H | 3.32911200  | 2.60690700  | -1.14653500 |
| H | 2.61973600  | 3.91707200  | -0.17852400 |
| H | 3.49463700  | 2.58043500  | 0.60067400  |
| H | 3.87382200  | -0.95847800 | 1.98222800  |
| H | 2.11544100  | -1.12594800 | 2.07856700  |
| H | 3.12651800  | -2.56371000 | 1.84132000  |
| H | 4.50099700  | -2.76190300 | -0.39287300 |
| H | 4.22081400  | -1.56381700 | -1.67674500 |
| H | 5.07984400  | -1.09396200 | -0.19732200 |
| H | -0.38838900 | -2.00456200 | -0.67244900 |
| H | 0.23014300  | -1.99332800 | 0.96008600  |
| H | 1.88591000  | -3.16792000 | -0.37420900 |
| H | 1.81950400  | -1.95740600 | -1.65649600 |

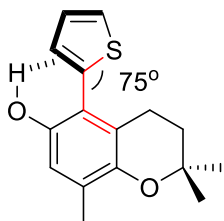

Sum of electronic and thermal Enthalpies: -1168.917234

0 1

|   |             |             |             |
|---|-------------|-------------|-------------|
| C | -2.91197300 | -1.33418500 | 0.03676800  |
| O | -2.78571100 | 0.10711400  | 0.16357300  |
| C | -1.53362900 | 0.67809500  | 0.08519200  |
| C | -0.34586400 | -0.05648900 | 0.17948200  |
| C | -0.40550300 | -1.55702200 | 0.37826300  |
| C | -1.79322900 | -1.99974600 | 0.85199900  |
| C | -1.52334200 | 2.08247200  | -0.05799900 |
| C | -0.29561500 | 2.73495900  | -0.11290800 |
| C | 0.90479900  | 2.02271300  | -0.03456400 |
| C | 0.89452600  | 0.62637900  | 0.11138600  |

|   |             |             |             |
|---|-------------|-------------|-------------|
| C | 2.18738000  | -0.09402900 | 0.19583000  |
| S | 2.81239700  | -1.03051800 | -1.15302300 |
| C | 4.24664700  | -1.45506500 | -0.27727700 |
| C | 4.25568800  | -0.89996000 | 0.97499100  |
| C | 3.08546500  | -0.12392600 | 1.24088400  |
| C | -2.82177100 | 2.84326600  | -0.14067500 |
| O | 2.06576000  | 2.74818700  | -0.11279700 |
| C | -2.85769000 | -1.70291000 | -1.45382000 |
| C | -4.28717800 | -1.65425100 | 0.62193500  |
| H | -0.25125800 | 3.81394100  | -0.22450200 |
| H | 2.89563400  | 0.38365400  | 2.18087500  |
| H | 5.06235500  | -1.04029100 | 1.68553700  |
| H | 4.99730600  | -2.08479100 | -0.73563700 |
| H | 2.81988100  | 2.14420300  | -0.03106000 |
| H | -3.42692900 | 2.69284200  | 0.76041300  |
| H | -2.63699200 | 3.91408400  | -0.26020300 |
| H | -3.42984400 | 2.49754900  | -0.98392600 |
| H | -3.68644900 | -1.22677400 | -1.98626100 |
| H | -1.92505400 | -1.37220100 | -1.91867500 |
| H | -2.94010500 | -2.78765800 | -1.58424600 |
| H | -4.49898400 | -2.72496400 | 0.53434700  |
| H | -4.33074500 | -1.37428400 | 1.67879500  |
| H | -5.06628600 | -1.10215600 | 0.08745900  |
| H | 0.35393700  | -1.86465200 | 1.10518500  |
| H | -0.14569200 | -2.07282800 | -0.55558700 |
| H | -1.89027100 | -3.08933800 | 0.78853600  |
| H | -1.93151400 | -1.72226500 | 1.90418200  |

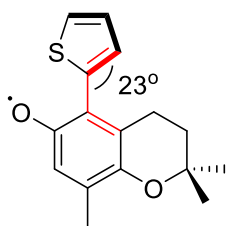

Sum of electronic and thermal Enthalpies: -1168.295870

0 2

|   |             |             |             |
|---|-------------|-------------|-------------|
| C | -2.34562800 | -1.67728000 | 0.53507000  |
| C | -2.15703000 | -0.36688000 | 0.09825000  |
| S | -3.70960300 | 0.29959100  | -0.41799200 |
| C | -4.52001300 | -1.18983000 | -0.09632100 |
| C | -3.67971800 | -2.14085700 | 0.43168000  |
| C | -0.93064800 | 0.41714500  | 0.05520100  |

|   |             |             |             |
|---|-------------|-------------|-------------|
| C | 0.35954000  | -0.15555100 | -0.02753900 |
| C | 1.49306000  | 0.68753100  | 0.01828000  |
| C | 1.40617200  | 2.11736100  | 0.11647800  |
| C | 0.16085200  | 2.67760700  | 0.13588300  |
| C | -1.05144600 | 1.89007000  | 0.07381900  |
| C | 0.59629200  | -1.63837900 | -0.23779700 |
| C | 1.97185200  | -1.90926300 | -0.85089700 |
| C | 3.08129200  | -1.18977200 | -0.08162200 |
| O | 2.77141700  | 0.23854900  | -0.05778800 |
| C | 3.21505900  | -1.66230900 | 1.37248000  |
| C | 4.42267900  | -1.27979600 | -0.80791600 |
| C | 2.66495500  | 2.94320200  | 0.17013200  |
| O | -2.16898400 | 2.45774000  | 0.03087900  |
| H | 0.02685300  | 3.75396500  | 0.18321000  |
| H | -1.55728800 | -2.28066100 | 0.96058100  |
| H | -3.99972000 | -3.12959200 | 0.74025700  |
| H | -5.58367400 | -1.27394200 | -0.27846400 |
| H | 3.28086000  | 2.78780300  | -0.72229400 |
| H | 2.41925600  | 4.00530000  | 0.24372000  |
| H | 3.28446300  | 2.66741000  | 1.03042400  |
| H | 4.02033900  | -1.11524700 | 1.87111300  |
| H | 2.29504800  | -1.49837200 | 1.93949300  |
| H | 3.45302600  | -2.73097600 | 1.40324400  |
| H | 4.76526400  | -2.31911000 | -0.83813600 |
| H | 4.33254200  | -0.91280300 | -1.83452200 |
| H | 5.17921400  | -0.68146200 | -0.29156100 |
| H | -0.18496200 | -2.04249400 | -0.88860000 |
| H | 0.51189700  | -2.18455400 | 0.71018600  |
| H | 2.17685900  | -2.98523500 | -0.86551900 |
| H | 1.99060300  | -1.56179500 | -1.89108600 |

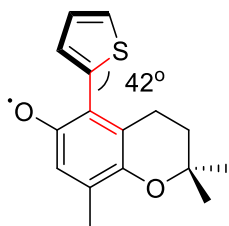

Sum of electronic and thermal Enthalpies: -1168.294717

02

|   |             |            |             |
|---|-------------|------------|-------------|
| C | -3.39795800 | 0.42930500 | -0.74275500 |
|---|-------------|------------|-------------|

|   |             |             |             |
|---|-------------|-------------|-------------|
| C | -2.24505900 | -0.03653900 | -0.13394800 |
| S | -2.60018800 | -1.54633000 | 0.70893500  |
| C | -4.25525900 | -1.51384900 | 0.20918500  |
| C | -4.52852900 | -0.41253100 | -0.56152800 |
| C | -0.94594700 | 0.63301900  | -0.06841700 |
| C | 0.28632400  | -0.04237500 | -0.12970900 |
| C | 1.48885800  | 0.69447000  | -0.01144700 |
| C | 1.51733900  | 2.12073200  | 0.13034200  |
| C | 0.32125200  | 2.78284400  | 0.15108100  |
| C | -0.95824100 | 2.10773400  | 0.06007900  |
| C | 0.38809200  | -1.53439400 | -0.39037000 |
| C | 1.76620300  | -1.91915200 | -0.93403600 |
| C | 2.89338900  | -1.32008300 | -0.08976700 |
| O | 2.72211300  | 0.13221100  | -0.05993800 |
| C | 2.89517800  | -1.82160600 | 1.36062900  |
| C | 4.25945100  | -1.53078100 | -0.74070700 |
| C | 2.83900200  | 2.83639600  | 0.23786000  |
| O | -2.02036100 | 2.77309200  | 0.10102300  |
| H | 0.27972200  | 3.86356900  | 0.24825400  |
| H | -3.41999100 | 1.36095100  | -1.29049800 |
| H | -5.50676300 | -0.20528900 | -0.98005700 |
| H | -4.92533700 | -2.30780100 | 0.51022400  |
| H | 3.46292600  | 2.65373600  | -0.64378900 |
| H | 2.68130900  | 3.91308700  | 0.33648700  |
| H | 3.41060300  | 2.48642100  | 1.10433900  |
| H | 3.71855700  | -1.36190800 | 1.91483900  |
| H | 1.96293300  | -1.57760200 | 1.87647500  |
| H | 3.02683200  | -2.90861000 | 1.38474300  |
| H | 4.50140100  | -2.59799100 | -0.77013200 |
| H | 4.26476400  | -1.14410100 | -1.76405100 |
| H | 5.03893300  | -1.01523400 | -0.17183400 |
| H | -0.38542900 | -1.83311800 | -1.10382100 |
| H | 0.18523500  | -2.10289800 | 0.52505400  |
| H | 1.87261700  | -3.00890900 | -0.96407300 |
| H | 1.87611000  | -1.55457900 | -1.96275500 |

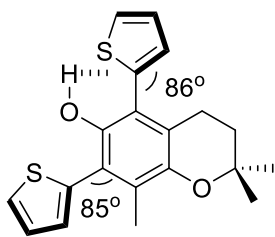

Sum of electronic and thermal Enthalpies: -1720.678979

0 1

|   |             |             |             |
|---|-------------|-------------|-------------|
| S | -3.95851300 | 0.26186000  | -1.20463800 |
| C | -2.99156600 | -0.10465300 | 0.20873800  |
| C | -3.79614700 | -0.23233000 | 1.31398700  |
| C | -5.18507800 | -0.04212900 | 1.03681500  |
| C | -5.42716400 | 0.23078600  | -0.28349600 |
| C | -1.51510700 | -0.22739300 | 0.12252000  |
| C | -0.88455600 | -1.47401000 | -0.03077200 |
| C | 0.52473900  | -1.52680500 | -0.08362900 |
| C | 1.31291800  | -0.37334800 | -0.01599300 |
| C | 0.67282200  | 0.87767500  | 0.13768000  |
| C | -0.72703700 | 0.93902900  | 0.20951900  |
| O | 1.05437800  | -2.78975700 | -0.24143100 |
| C | 2.47059800  | -2.99608000 | 0.00649700  |
| C | 3.25622100  | -1.84532700 | -0.63884600 |
| C | 2.82110100  | -0.48241300 | -0.09209000 |
| C | 1.45014600  | 2.13913900  | 0.22691400  |
| C | 1.87958200  | 2.80783000  | 1.35113300  |
| C | 2.60737600  | 4.00496300  | 1.06883700  |
| C | 2.72688700  | 4.24474700  | -0.27452800 |
| S | 1.94736700  | 3.01532500  | -1.21503000 |
| C | -1.65676700 | -2.76453900 | -0.14354200 |
| O | -1.38503000 | 2.12770300  | 0.36881600  |
| C | 2.78951500  | -4.32960200 | -0.66869900 |
| C | 2.69622800  | -3.08861700 | 1.52354000  |
| H | 1.68118600  | 2.44107400  | 2.35267800  |
| H | 3.02046200  | 4.65554500  | 1.83130100  |
| H | 3.22072300  | 5.07296700  | -0.76484000 |
| H | -0.73033800 | 2.83895700  | 0.44271200  |
| H | -1.38126000 | -3.45253700 | 0.66358600  |
| H | -2.73209200 | -2.59126600 | -0.10358100 |
| H | -1.41479500 | -3.27787700 | -1.08061600 |
| H | 2.16032300  | -5.12493100 | -0.25765500 |



|   |             |             |             |
|---|-------------|-------------|-------------|
| H | 2.60725800  | -4.26896000 | -1.74583100 |
| H | 3.83848000  | -4.59794300 | -0.50562200 |
| H | -6.37672700 | 0.41604500  | -0.76716500 |
| H | -5.96569200 | -0.10505700 | 1.78675700  |
| H | -3.39877600 | -0.45113300 | 2.29907000  |
| H | 3.75884700  | -3.23748700 | 1.74504800  |
| H | 2.36322700  | -2.18313600 | 2.03805900  |
| H | 2.13590100  | -3.93425400 | 1.93329400  |
| H | 3.22517400  | 0.31541900  | -0.72290900 |
| H | 3.25300800  | -0.31626300 | 0.90429000  |
| H | 3.08073500  | -1.88216600 | -1.72092100 |
| H | 4.32962200  | -1.99705400 | -0.47955300 |

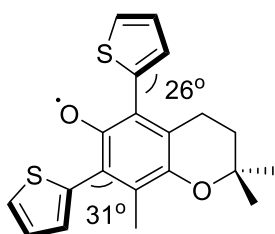

Sum of electronic and thermal Enthalpies: -1720.059783

0 2

|   |             |             |             |
|---|-------------|-------------|-------------|
| S | -4.01981500 | 0.28387700  | -0.53299500 |
| C | -2.83719500 | -0.82759600 | 0.14485200  |
| C | -3.49292200 | -1.84801400 | 0.82056100  |
| C | -4.90832300 | -1.75923100 | 0.77151800  |
| C | -5.33582000 | -0.67232200 | 0.04834900  |
| C | -1.39296200 | -0.63621400 | 0.00665600  |
| C | -0.49149400 | -1.69339300 | -0.07619500 |
| C | 0.90819400  | -1.39974000 | -0.07652000 |
| C | 1.44746100  | -0.09007400 | -0.01659400 |
| C | 0.56197300  | 0.99747300  | 0.03702200  |
| C | -0.88528500 | 0.74436200  | -0.06834800 |
| O | 1.68616400  | -2.50979600 | -0.16782800 |
| C | 3.14368400  | -2.44908400 | -0.09102100 |
| C | 3.61003900  | -1.15137500 | -0.75131700 |
| C | 2.95171600  | 0.06846900  | -0.10569100 |
| C | 1.00182800  | 2.38419500  | 0.15599300  |
| C | 2.15641900  | 2.87492600  | 0.75961700  |
| C | 2.29280600  | 4.28426200  | 0.69780500  |
| C | 1.24636600  | 4.87803600  | 0.03434000  |
| S | 0.05558900  | 3.73432300  | -0.47097700 |

|   |             |             |             |
|---|-------------|-------------|-------------|
| C | -0.89809600 | -3.14061100 | -0.22868200 |
| O | -1.67941100 | 1.69570800  | -0.23483900 |
| C | 3.61952500  | -3.67858800 | -0.86420800 |
| C | 3.53680200  | -2.55160700 | 1.38928200  |
| H | 2.86847200  | 2.24604500  | 1.27482700  |
| H | 3.12356400  | 4.82908600  | 1.13169000  |
| H | 1.09271300  | 5.93310900  | -0.15195700 |
| H | -0.86337300 | -3.68090100 | 0.72595800  |
| H | -1.91127600 | -3.22040900 | -0.62339000 |
| H | -0.21098100 | -3.65598400 | -0.90265200 |
| H | 3.20120600  | -4.59113800 | -0.42922300 |
| H | 3.31010200  | -3.62073700 | -1.91189200 |
| H | 4.71151100  | -3.74690300 | -0.82675500 |
| H | -6.35439400 | -0.36025300 | -0.14220600 |
| H | -5.57477200 | -2.46338400 | 1.25654300  |
| H | -2.96896700 | -2.62097500 | 1.36751600  |
| H | 4.62650500  | -2.52079200 | 1.49510900  |
| H | 3.11062700  | -1.73731400 | 1.98093800  |
| H | 3.17611800  | -3.49592900 | 1.80700900  |
| H | 3.18764800  | 0.96844300  | -0.68119700 |
| H | 3.38557000  | 0.22636900  | 0.88981600  |
| H | 3.35420600  | -1.19252200 | -1.81713000 |
| H | 4.70081700  | -1.07756300 | -0.68262700 |
